# Supplementary material
Source: HighWire-hosted journal article supplement (doi:10.1101/rna.079778.123)

Supplemental Material

for

Rational design of eukaryotic riboswitches that
up-regulate IRES-mediated translation initiation
with high switching efficiency
through a kinetic trapping mechanism in vitro

*Hajime Takahashi, Masahiro Fujikawa and Atsushi Ogawa**

*Proteo-Science Center, Ehime University, 2-5 Bunkyo, Matsuyama, Ehime 790-8577, Japan*

*E-mail: ogawa.atsushi.mf@ehime-u.ac.jp

**CONTENTS:**

**Sequences of Primers. (p. S2)**

**Sequences of Optimized Riboswitches. (p. S4)**

**Supplementary Figures and Tables. (p. S5)**

**Sequences of Primers.**

(written from 5’ (left) to 3’ (right); shaded: T7 promoter; italic: 5SL; green: MS; purple: aaIRES; oragne: aptamer cores; underlined: US; doubly underlined: LS; pink marker: mutated nucleotides; red: aIRES; gray: additional loop nucleotides for stable aaIRES/aIRES duplexes; cyan: PSIV IRES; green marker: start codon; bold: *Spe* I site; yellow marker: genes)

FP-P-1: GAA ATT AAT ACG ACT CAC TAT A*GG GAG ACC ACA ACG GTT TCC C*TG ACT ATG TGA TCT TAT TAA AAT TAG G

RP-PI: TTC CAT **ACT AGT** TTC TTT TTC TTG AAG TGA GAT TCT TTT CGC AC

FP-5F: GAA ATT AAT ACG ACT CAC TAT A*G*

FP-YP: GAT ATC **ACT AGT** AGG GCC CAT CAC CAT CAC CAT CAT

RP-YP: TTA GCG GCT TTA TTG ATT GC

FP-5F2: GAA ATT AAT AC GAC TCA CTA TA*G GGA GAC C*

FP-5F41: GAA ATT AAT ACG ACT CAC TAT A*GG GAG ACC ACA ACG GTT TC*

FP-NL: GAT ATC **ACT AGT** AGG GTC TTC ACA CTC GAA GAT TTC

RP-3U-1: TCC CGA CTG GAA AGC GGG CAG TGA AAG GAA GGC CCA TGA GGC CCA GGA GCT CGA GTT ACG CCA GAA TGC GTT CGC ACA G

RP-3U-2: ATA CGC AAG GAA ACA GCT ATG ACC ATG TTA ATG CAG CTG GCA CGA CAG GTT TCC CGA CTG GAA AGC GGG CAG TGA A

FP-F: GAA ATT AAT ACG ACT CAC TAT A*GG GAG ACC ACA ACG GT*

RP-F: ATA CGC AAG GAA ACA GCT ATG AC

FP-PI: AGA CCT CTG CTG ACT ATG TGA TC

FP-PI-long: CGA CTC ACT ATA *GGG AGA CCA CAA CGG TTT CCC* TAG ACC TCT GCT GAC TAT GTG ATC TTA TTA AAA TTA GG

FP-PI-aa8a8: ATA *GGG AGA CCA CAA CGG TTT CCC* AAG AGG TCT ACC ACA GAC CTC TGC TGA CTA TGT GAT CTT ATT AAA ATT AGG

FP-PI-aa9a8: ACG ACT CAC TAT A*GG GAG ACC ACA ACG GTT TCC C*AA GAG GTC TGA ACC ACA GAC CTC TGC TGA CTA TGT GAT CTT ATT AAA ATT AGG

FP-PI-aa10a8: ACG ACT CAC TAT A*GG GAG ACC ACA ACG GTT TCC C*AA GAG GTC TGT AAA CCA CAG ACC TCT GCT GAC TAT GTG ATC TTA TTA AAA TTA GG

FP-PI-aa11a8: ACG ACT CAC TAT A*GG GAG ACC ACA ACG GTT TCC C*AA GAG GTC TGT GAA AAC CAC AGA CCT CTG CTG ACT ATG TGA TCT TAT TAA AAT TAG G

FP-PI-aa12a8: ACG ACT CAC TAT A*GG GAG ACC ACA ACG GTT TCC C*AA GAG GTC TGT GGA AAA ACC ACA GAC CTC TGC TGA CTA TGT GAT CTT ATT AAA ATT AGG

theo-IS*L*-1 (*L* = 11, 12, 13, 14, or 15):

*CACAACGGTTTCCC*AX1X2X3X4ATACCAGCGAGACCTCTCGCCCTTGGCAGZ1Z2Z3Z4GCGAGAGGTCTGTAAACCACAGACCTCTGCTGACTATGTGATC

(X1X2X3X4/Z1Z2Z3Z4: GGTG/CACC for *L* = 11; CGTG/CACG for *L* = 12, CCAG/CTGG for *L* = 13, CCTG/CAGG for *L* = 14, CCTT/AAGG for *L* =15)

theo-IS*L*-2 (*L* = 11, 12, 13, 14, or 15):

ACGACTCACTATA*GGGAGACCACAACGGTTTCCC*AX1X2X3X4ATAC

m-theo-IS14-1

*CACAACGGTTTCCC*ACCTGATACCAGCGAGACCTCTCGCCCTAGACAGCAGGGCGAGAGGTCTGTAAACCACAGACCTCTGCTGACTATGTGATC

tc-IS*L*-1 (*L* = 11, 12, or 13):

AGAGGTGAAGAATACGACCACCTZ1Z2Z3Z4GCGAGAGGTCTGTAAACCACAGACCTCTGCTGACTATGTGATCTTATTAAAATTAGG

(Z1Z2Z3Z4: GACC for *L* = 11; GAGT for *L* = 12, GACT for *L* = 13)

tc-IS*L*-1 (*L* = 14 or 15):

GGTGAAGAATACGACCACCTZ1Z2Z3Z4GCGAGAGGTCTGTAAACCACAGACCTCTGCTGACTATGTGATCTTATTAAAATTAGG

(Z1Z2Z3Z4: GTCT for *L* = 14; CTCT for *L* = 15)

tc-IS*L*-2 (*L* = 11, 12, or 13):

ACGACTCACTATA*GGGAGACCACAACGGTTTCCC*AX1X2X3X4AAAACATAGCGAGACCTCTCGCAGAGGTGAAGAATACGACC

(X1X2X3X4: GGTC for *L* = 11; ACTC for *L* = 12, AGTC for *L* = 13)

tc-IS*L*-2 (*L* = 14 or 15):

ACGACTCACTATA*GGGAGACCACAACGGTTTCCC*AX1X2X3X4AAAACATAGCGAGACCTCTCGCAGAGGTGAAGAATACGACCAC

(X1X2X3X4: AGAC for *L* = 14; AGAG for *L* = 15)

FMN-IS*L*-1 (*L* = 11, 12, 13, or 14):

CTATA*GGGAGACCACAACGGTTTCCC*AX1X2X3X4GAAGGGCGAGACCTCTCGCAGGATAZ1Z2Z3Z4GCGAGAGGTCTGTAAACCACAGACCTCTGCTGACTATGTG

(X1X2X3X4/Z1Z2Z3Z4: CGCA/TGCG for *L* = 11; ACCA/TGGT for *L* = 12, AGCA/TGCT for *L* = 13, AGGA/TCCT for *L* = 14)

**Sequences of Optimized Riboswitches.**

(written from 5’ (left) to 3’ (right); italic: 5SL; green: MS; purple: aaIRES; oragne: aptamer cores; underlined: US; doubly underlined: LS; red: aIRES; gray: additional loop nucleotides for stable aaIRES/aIRES duplexes; cyan: PSIV IRES; light blue marker: 5’-side PK-III region targeted by aIRES; green marker: start codon; bold: *Spe* I site)

**theo-IS14**:

*GGGAGACCACAACGGUUUCCC*ACCUGAUACCAGCGAGACCUCUCGCCCUUGGCAGCAGGGCGAGAGGUCUGUAAACCACAGACCUCUGCUGACUAUGUGAUCUUAUUAAAAUUAGGUUAAAUUUCGAGGUUAAAAAUAGUUUUAAUAUUGCUAUAGUCUUAGAGGUCUUGUAUAUUUAUACUUACCACACAAGAUGGACCGGAGCAGCCCUCCAAUAUCUAGUGUACCCUCGUGCUCGCUCAAACAUUAAGUGGUGUUGUGCGAAAAGAAUCUCACUUCAAGAAAAAGAA**ACUAGU**

**tc-IS12**:

*GGGAGACCACAACGGUUUCCC*AACUCAAAACAUAGCGAGACCUCUCGCAGAGGUGAAGAAUACGACCACCUGAGUGCGAGAGGUCUGUAAACCACAGACCUCUGCUGA…

**FMN-IS13**:

*GGGAGACCACAACGGUUUCCC*AAGCAGAAGGGCGAGACCUCUCGCAGGAUAUGCUGCGAGAGGUCUGUAAACCACAGACCUCUGCUGA…


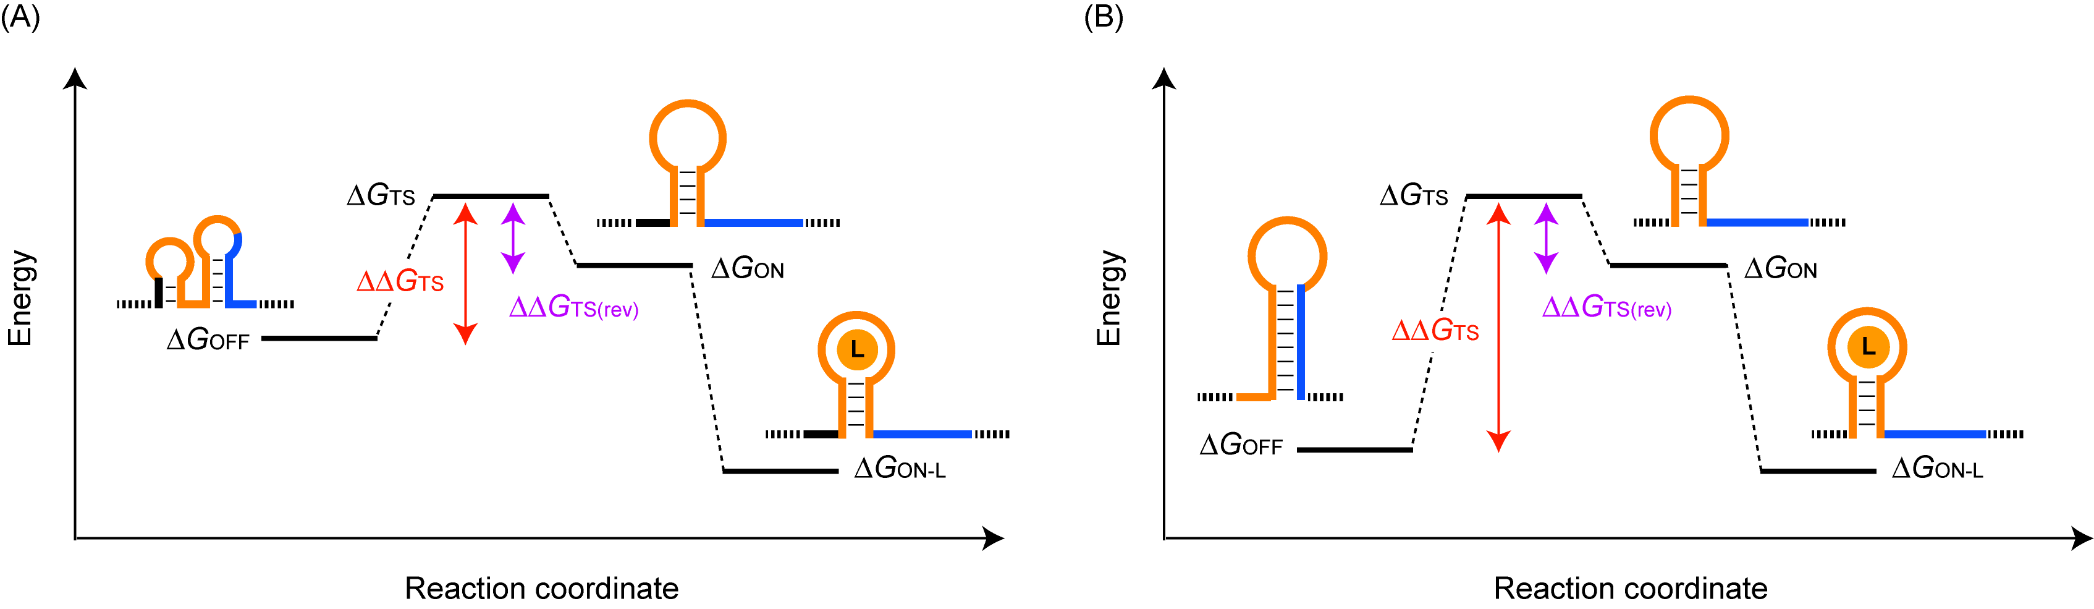


**Figure S1.** Energy diagrams of eq-ON-riboswitches (A) and kt-ON-riboswitches (B). D*G*OFF, D*G*ON, D*G*ON-L, and D*G*TS refer to the free energy of the formation of the inactive OFF structure, the active ON structure, the latter with a ligand molecule, and the transition-state structure, respectively. DD*G*TS and DD*G*TS(rev) are activation free energy for the forward transition and the reverse transition, respectively. Each structure except for the transition-state one is shown above the corresponding energy level. In eq-ON-riboswitches, the OFF structure and the ON structure are in a dynamic equilibrium due to the relatively small DD*G*TS. In kt-ON-riboswitches, the forward transition is considerably suppressed even in the presence of their ligands due to large DD*G*TS, in contrast to the rapid reverse transition with small DD*G*TS(rev).


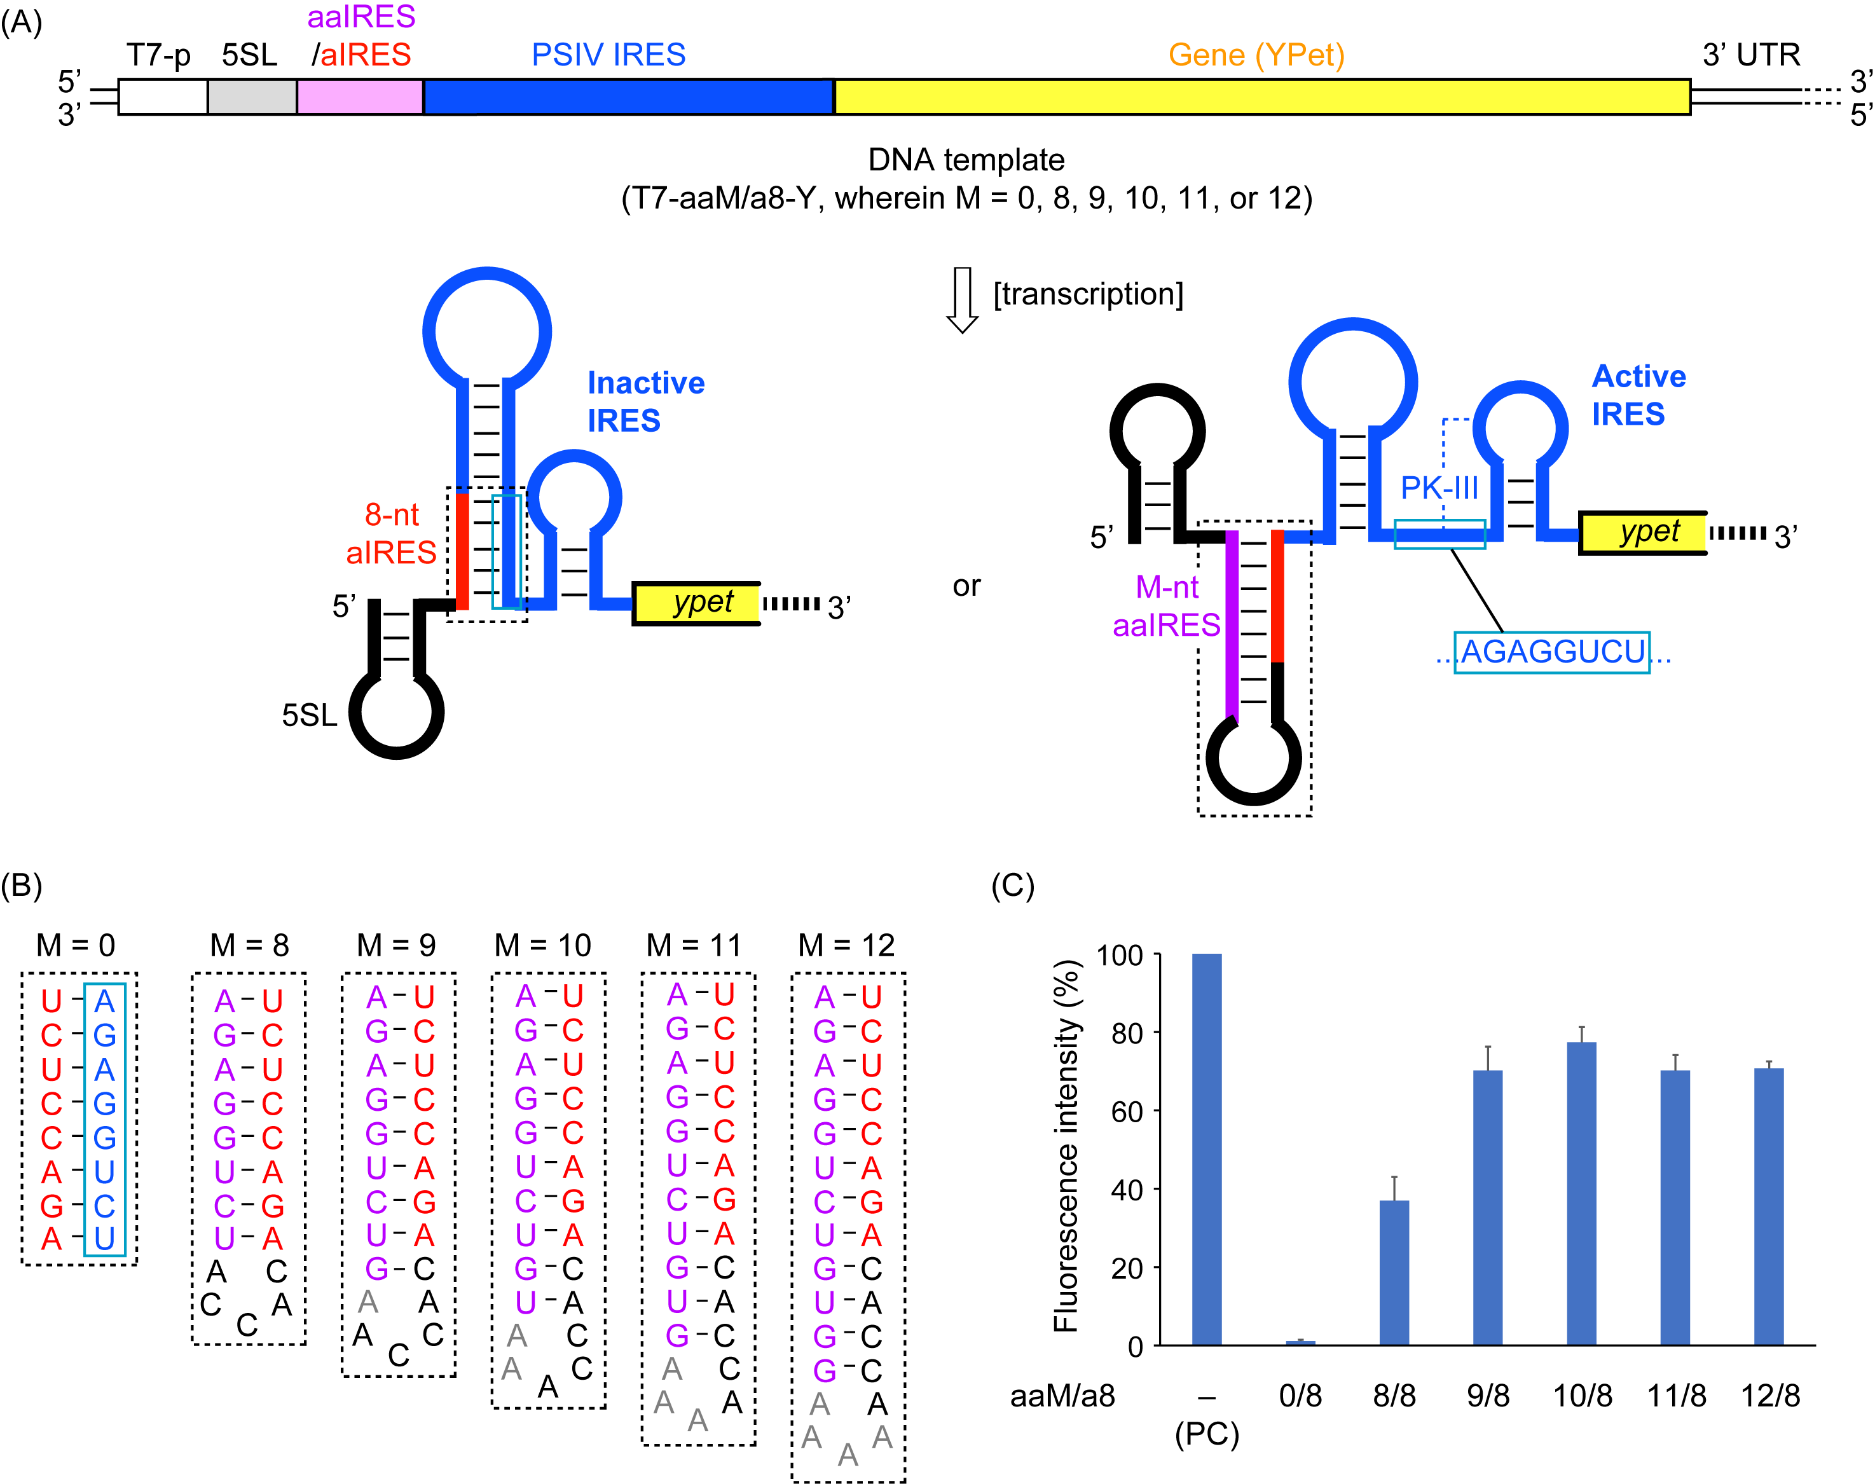


**Figure S2.** Optimal lengths of aIRES and aaIRES in the WGE-based cIVTT system. (A) Schematic of DNA templates used (T7-aaM/a8-Y, wherein M = 0, 8, 9, 10, 11, or 12) and predicted secondary structures of the PSIV IRES with the 8-nt aIRES (left) or aaIRES/aIRES duplexes (right) transcribed *in situ*. T7-p means the T7 promoter. The secondary structures of the IRES are roughly simplified. The solid cyan boxes represent the 5’-side pseudoknot III (PK-III), which is targeted by aIRES to inactivate the IRES. (B) Sequences of the aIRES and the aaIRES/aIRES duplexes. Some adenine nucleotides inserted to stabilize aaIRES/aIRES stem-loop structures are shown in gray. (C) Fluorescence intensities of YPet expressed from each DNA template in the WGE-based cIVTT system, relative to that by PC-DNA-Y (PC), which is the positive control DNA lacking an aaIRES/aIRES-encoding region. The error bars represent the standard deviation (*n* = 4).


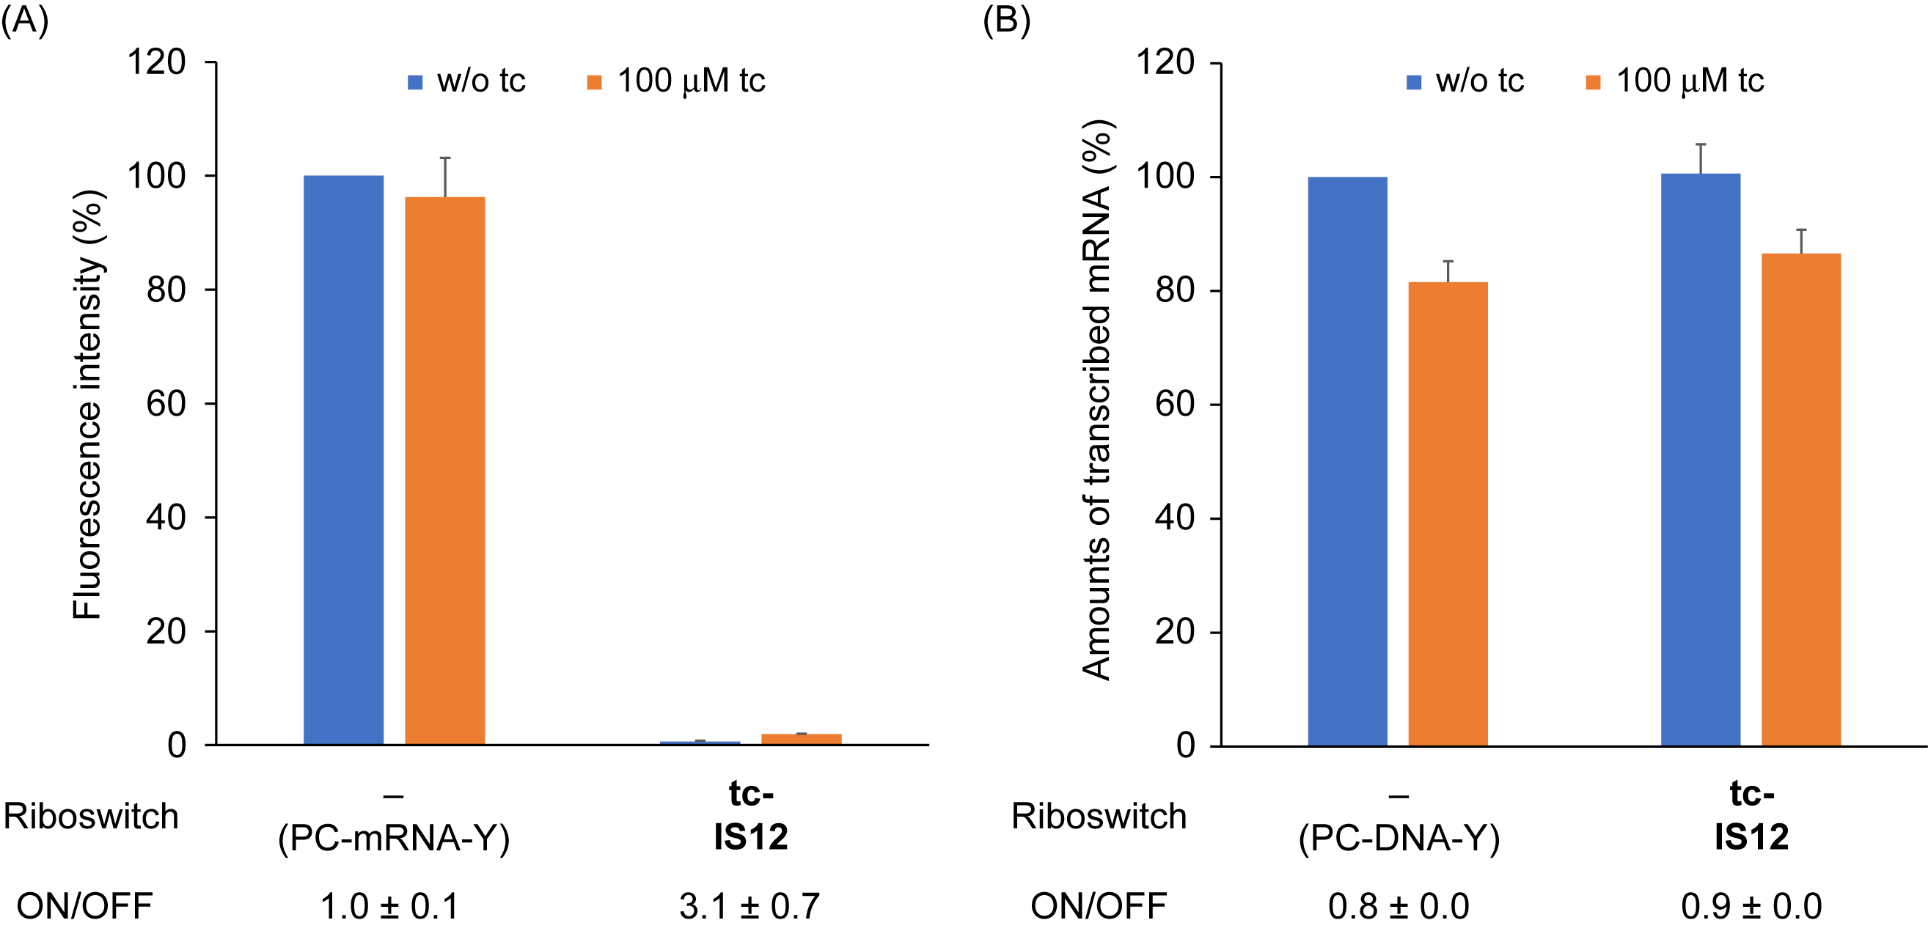


**Figure S3.** Confirmation that **tc-IS12** is a kt-ON-riboswitch. (A) Relative fluorescence intensities of YPet expressed by conventional translation of mRNA with **tc-IS12** (tc-IS12-Y) in the absence or presence of 100 mM tetracycline in WGE. (B) Relative amounts of mRNA transcribed from the DNA template encoding **tc-IS12** (T7-tc-IS12-Y) in the absence or presence of 100 mM tetracycline under the cIVTT conditions. The error bars represent the standard deviation (*n* = 4).


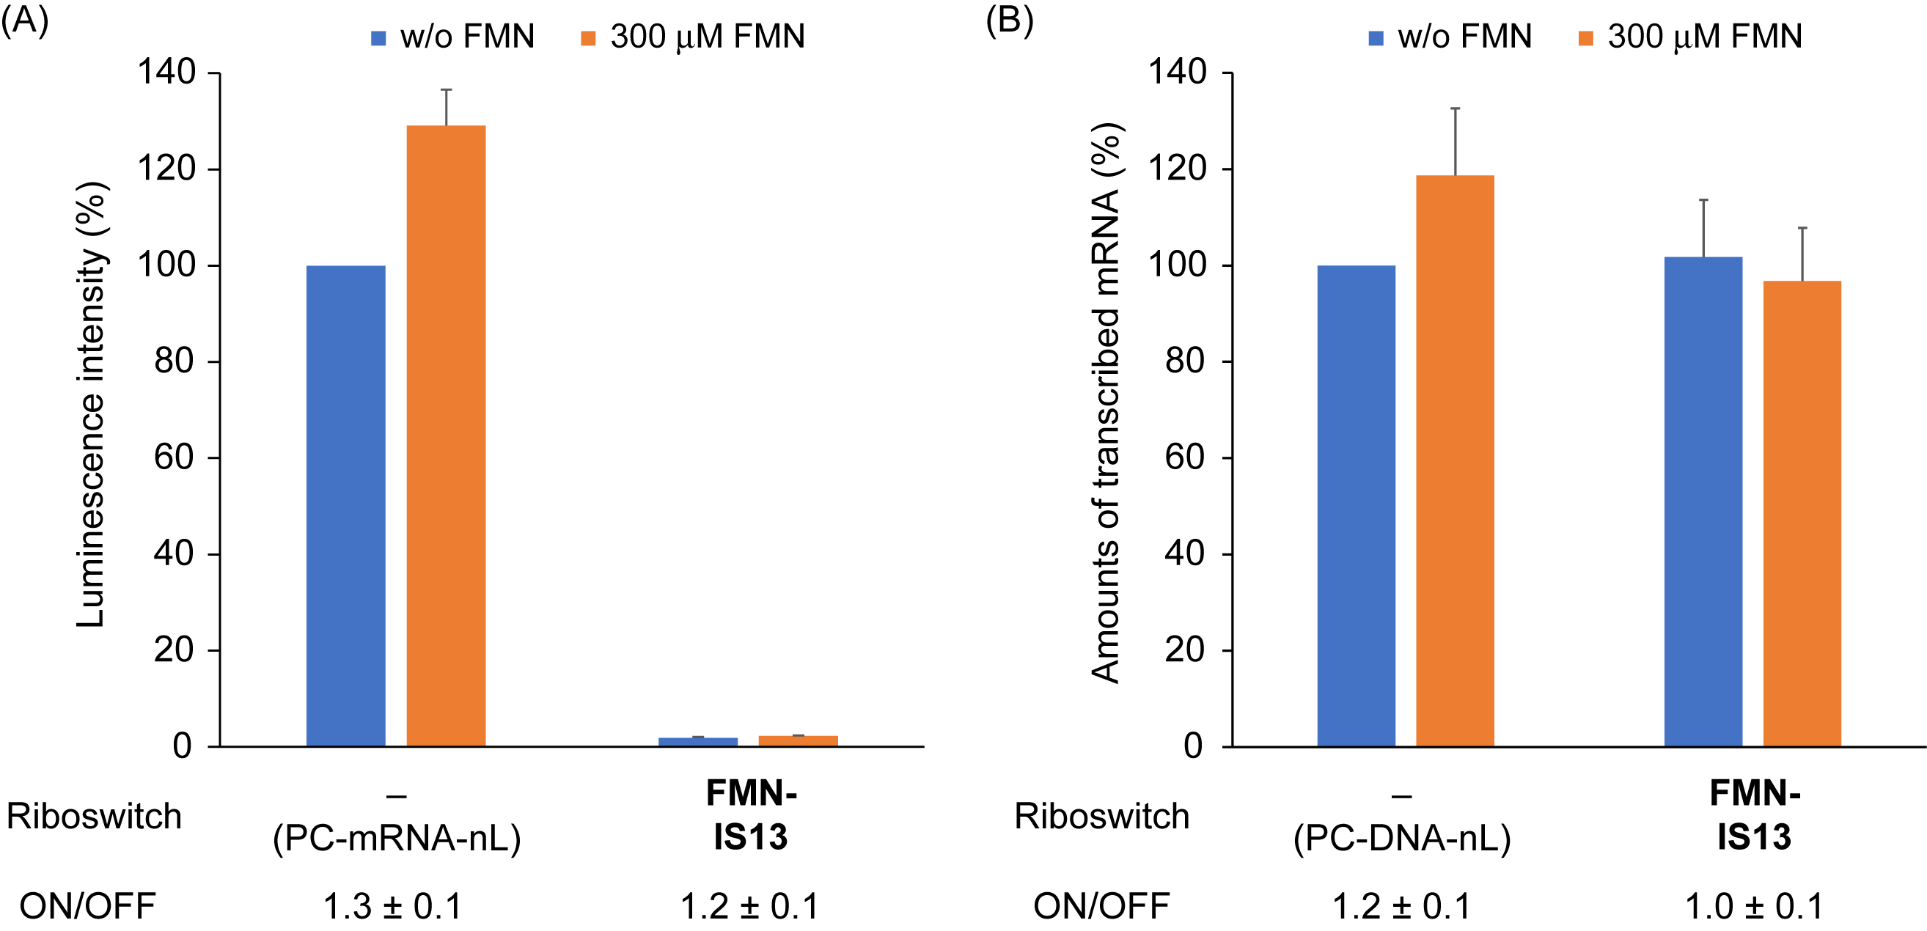


**Figure S4.** Confirmation that **FMN-IS13** is a kt-ON-riboswitch. (A) Relative luminescence intensities of nLuc expressed by conventional translation of mRNA with **FMN-IS13** (FMN-IS13-nL) in the absence or presence of 300 mM FMN in WGE. (B) Relative amounts of mRNA transcribed from the DNA template encoding **FMN-IS13** (T7-FMN-IS13-nL) in the absence or presence of 300 mM FMN under the cIVTT conditions. The error bars represent the standard deviation (*n* = 4).

**
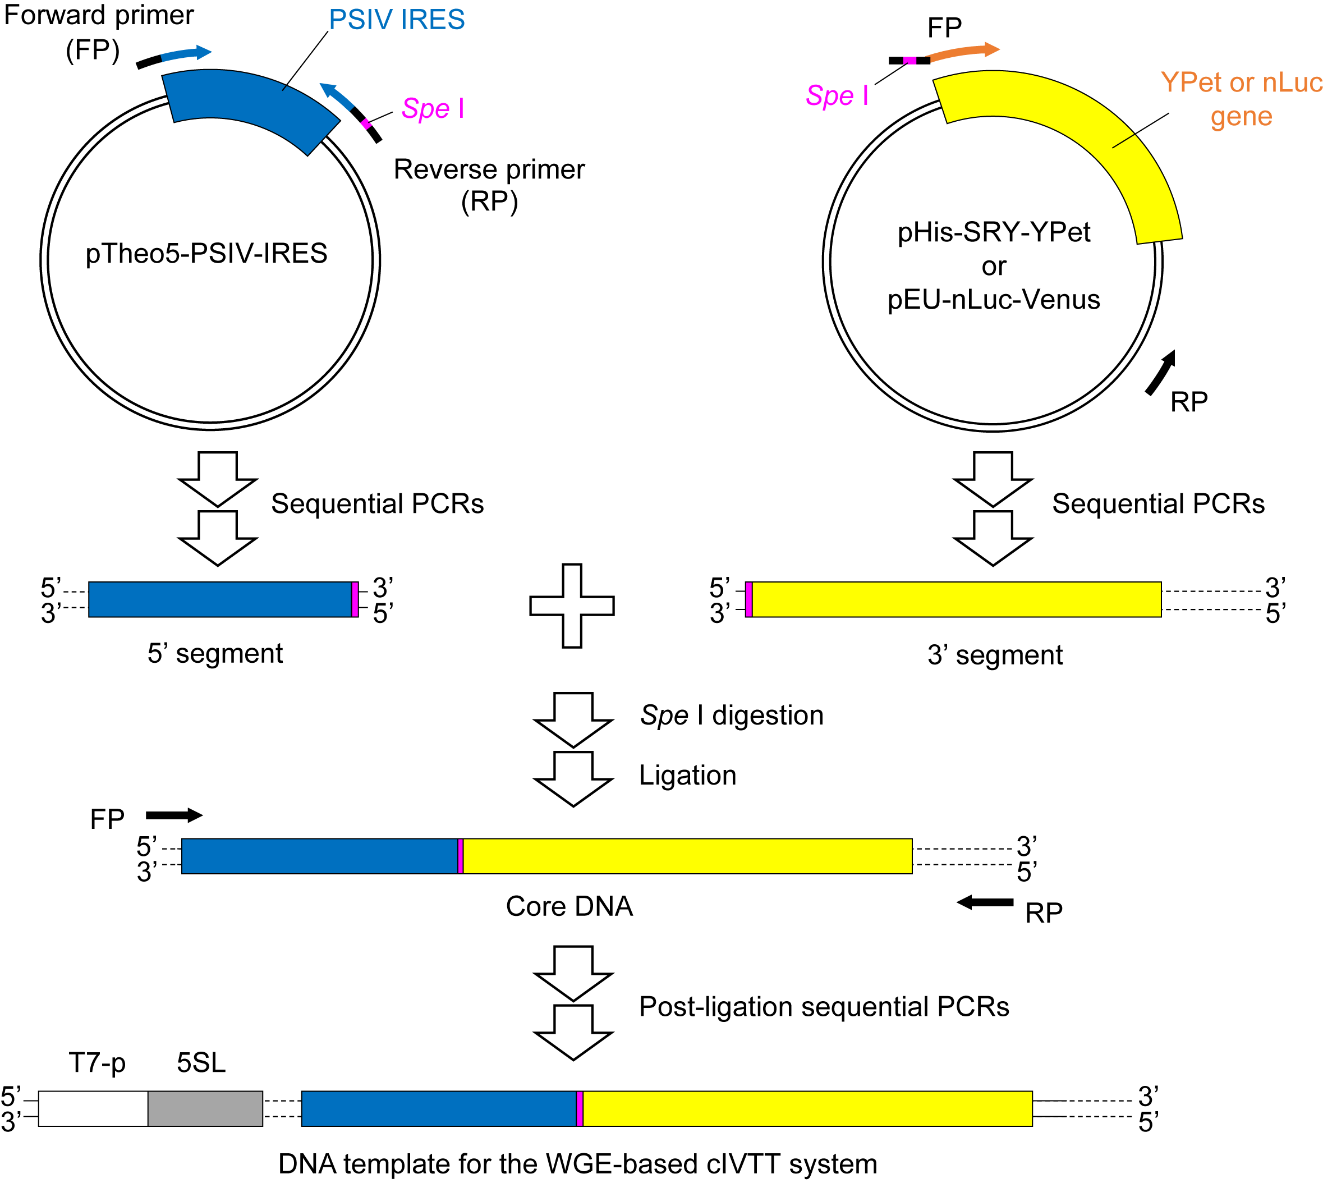
**

**Figure S5.** A workflow schema for preparing DNA templates for the WGE-based cIVTT system. See the experimental section in the main text for more details.

**Table S1.** Primers used for preparation of core DNAs. FP and RP mean forward and reverse primers, respectively.


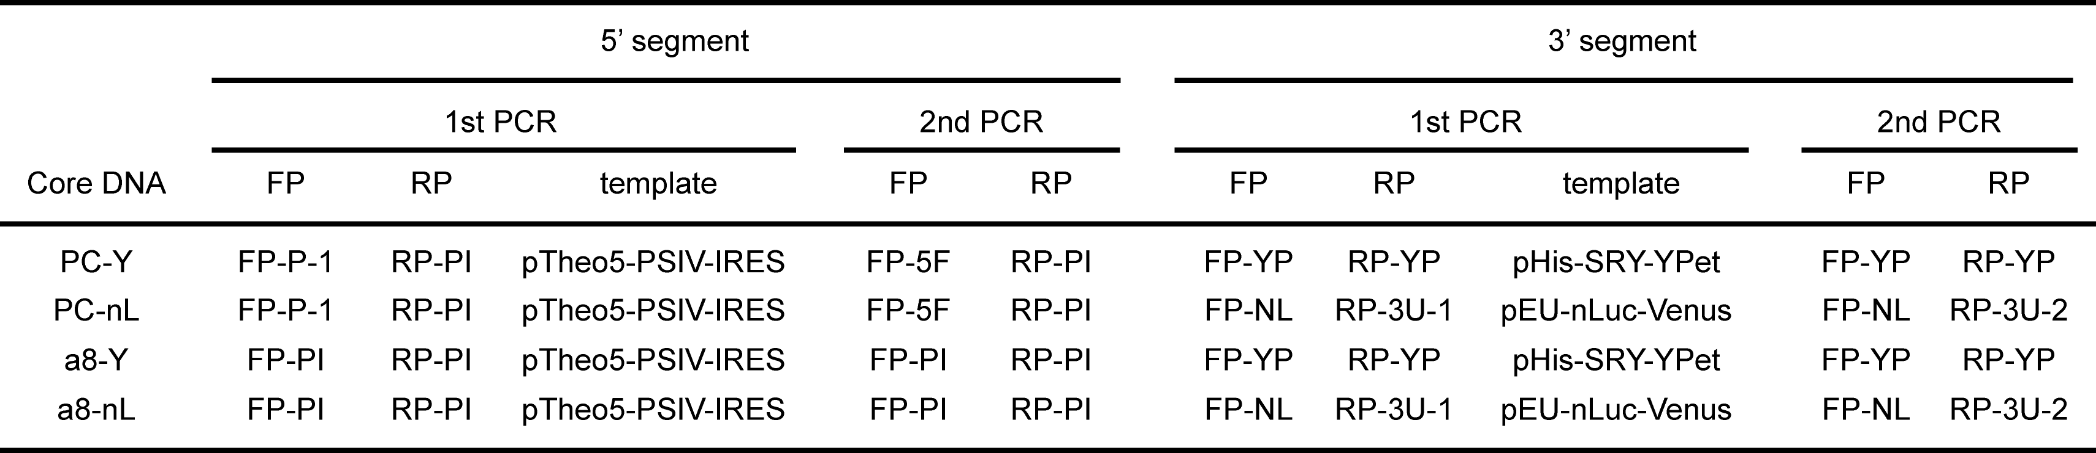


**Table S2.** DNA templates for the WGE-based cIVTT system and primers used for their preparation. mRNA templates used in this study for conventional translation in WGE are also indicated. FP and RP mean forward and reverse primers, respectively.


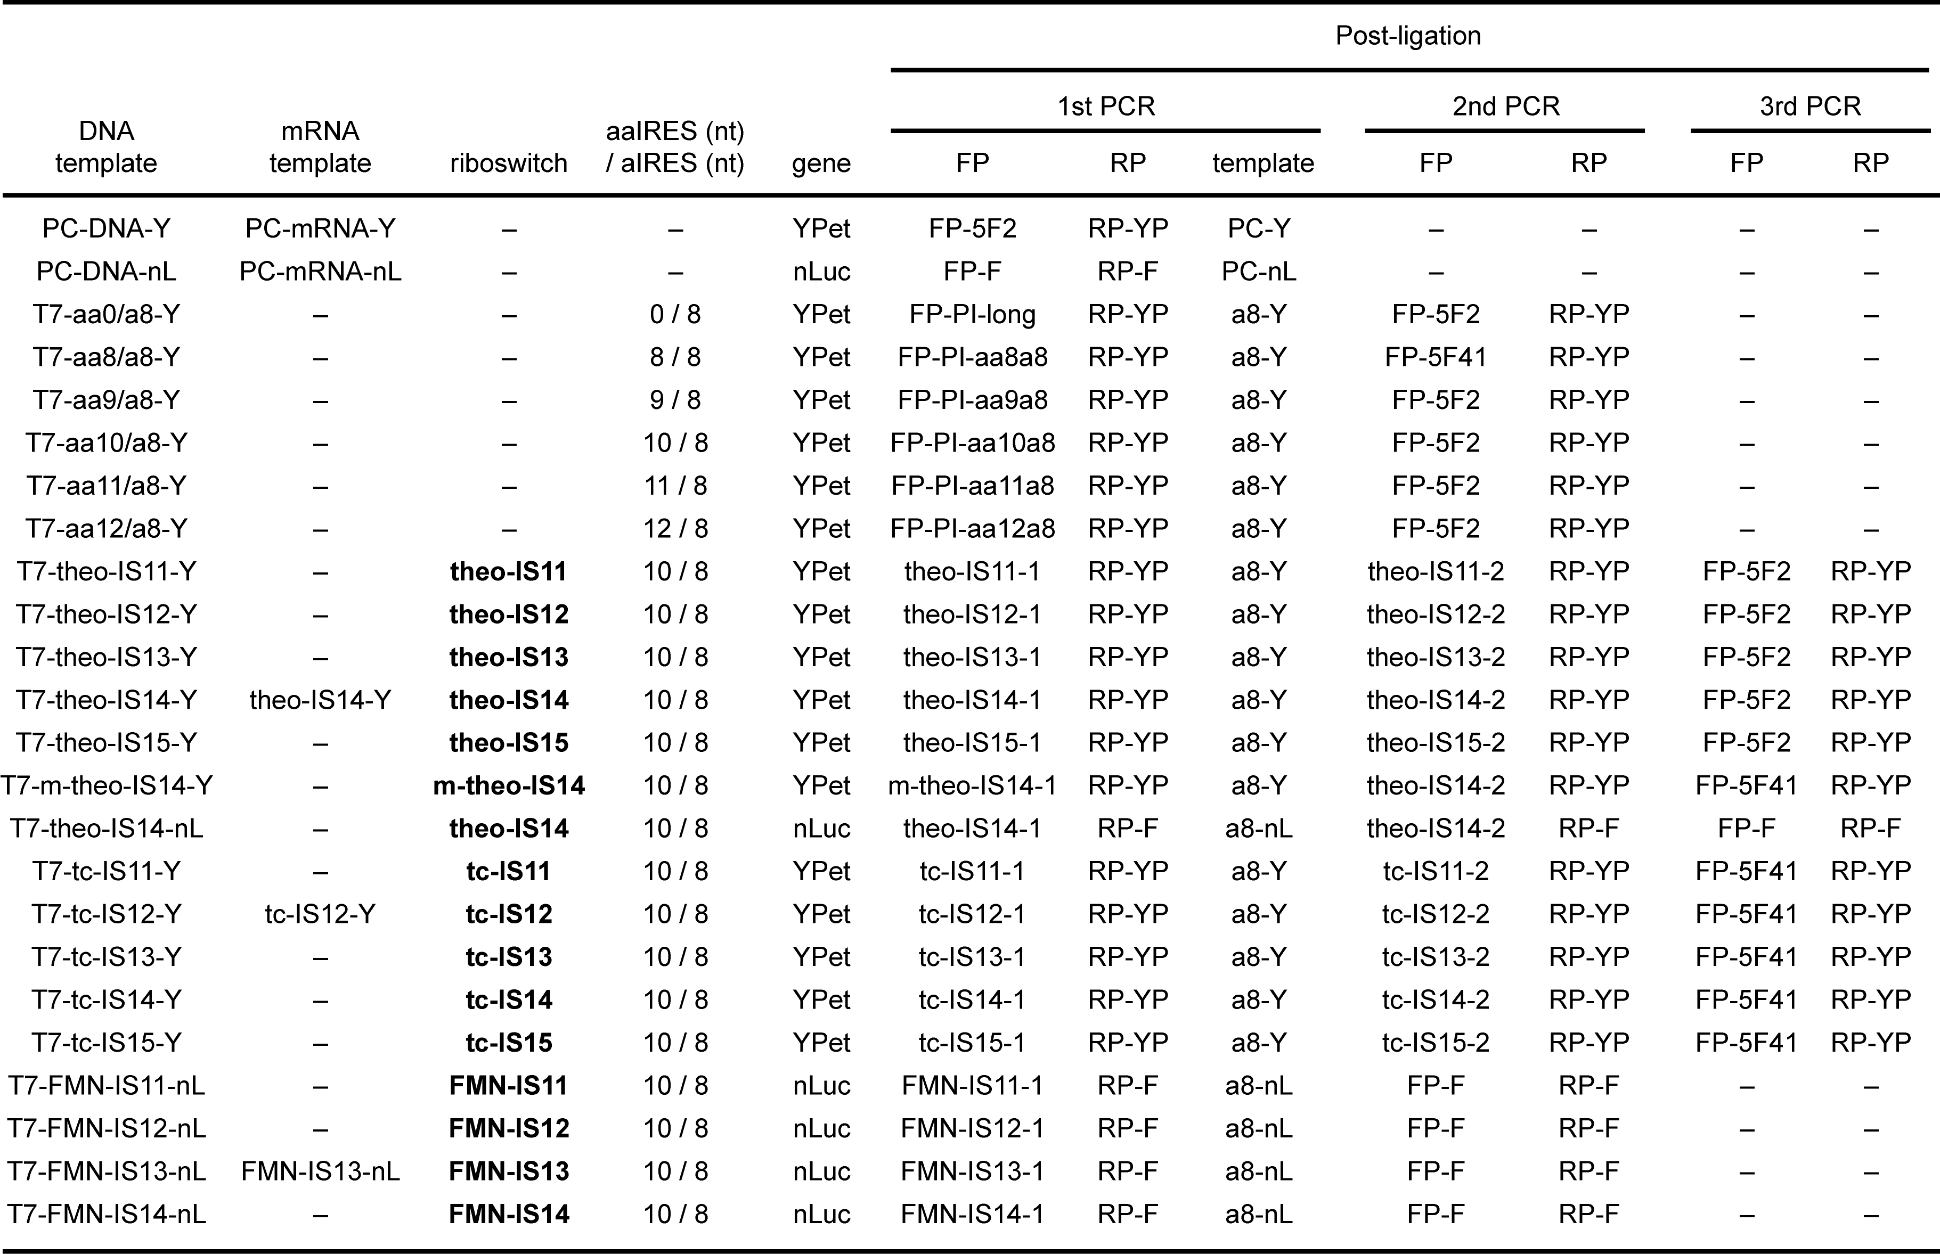

Supplement: Supplemental_Material_.docx [file Supplemental_Material_.docx]
